# Supplementary material
Source: PubMed Central journal article supplement (PMC2762661)
Supplement: 0907448106_0907448106SI.pdf [file 0907448106_0907448106SI.pdf]

# Supporting Information

Hinrichs et al. 10.1073/pnas.0907448106

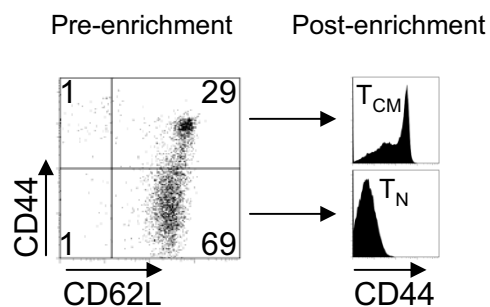

**Fig. S1.** CD8<sup>+</sup> T cells enriched for naïve (CD62L<sup>+</sup> CD44<sup>low</sup>) or central memory (CD62L<sup>+</sup> CD44<sup>high</sup>) phenotype can be isolated from the spleens of pmel-1 mice. Flow cytometric analysis was performed on splenocytes from a 6-week-old pmel-1 mouse. The dot plot is gated on CD8<sup>+</sup> lymphocytes. The histograms show expression of CD44 by the two subsets following enrichment. The experiment was independently repeated five times with similar results.



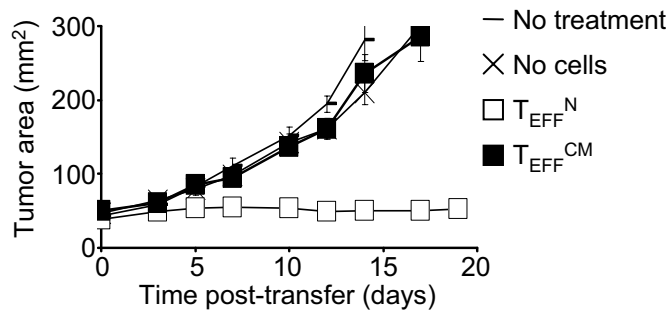

**Fig. 53.** Adoptive transfer of effector cells generated directly from naïve cells improves tumor treatment.  $2 \times 10^7$  effector cells generated by secondary stimulation were infused. Adjuvant vaccine and IL-2 were administered to all except the "No treatment" group. The standard error of the mean is indicated by the error bars. ( $n = 5$  mice per treatment group).  $T_{EFF}^N$  versus  $T_{EFF}^{CM}$ ,  $P < 0.001$ . The experiment was independently repeated with similar results.

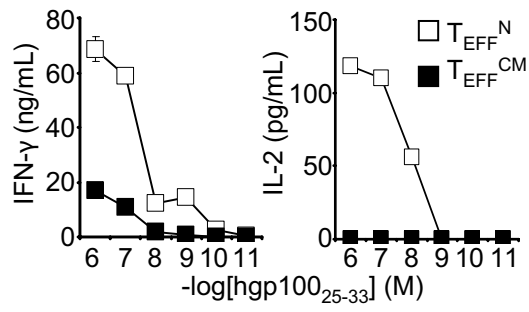

**Fig. S4.** Following infusion,  $T_{\text{EFF}}^{\text{N}}$  maintain greater production of IFN- $\gamma$  and IL-2 than  $T_{\text{EFF}}^{\text{CM}}$ . Effector cells generated by secondary stimulation were adoptively transferred then reisolated from spleens 6 days following infusion. Cell numbers were equalized and production of IFN- $\gamma$  and IL-2 in overnight coculture assays was determined. Error bars indicate the standard error of the mean. Experiment was independently repeated with similar results.





**Table S1. Differential expression of selected genes with described function in T cells**

| Fold $\Delta^*$ | Gene product         | Function                                 |
|-----------------|----------------------|------------------------------------------|
| 233             | IL-2                 | Cytokine, activation and differentiation |
| 27              | Integrin- $\alpha_E$ | Adhesion molecule, mucosal homing        |
| 26              | Slamf1               | Costimulation                            |
| 25              | Ox40                 | Costimulation                            |
| 16              | Hivep3               | Transcription factor, IL-2 regulation    |
| 8               | Stat5a               | Transcription factor, cytokine signaling |
| -5              | CD62L                | Adhesion molecule, lymphoid homing       |
| -6              | Eomes                | Transcription factor, effector function  |
| -14             | Klrg1                | Inhibitory receptor, senescence          |

\*Increased expression T<sub>EFF</sub><sup>N</sup>
